# Supplementary material for: A Novel Assay Method to Determine the β-Elimination of Se-Methylselenocysteine to Monomethylselenol by Kynurenine Aminotransferase 1
Source: MDPI journal article supplement (doi:10.3390/antiox9020139), 2020-02-05
Supplement: s1 [file s1]

# Supplementary Materials:

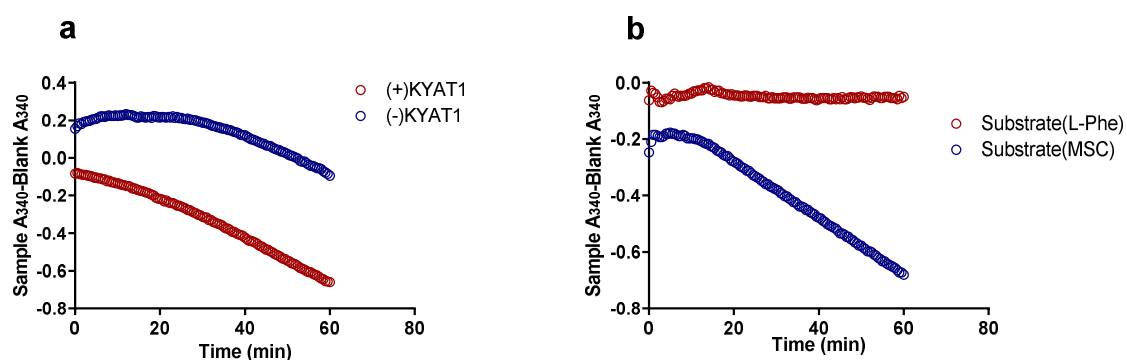

**Figure S1.** Coupled activity assay (a) With and without KYAT1(100 ng) enzyme (b) with L-Phe and MSC as a substrate with 100 ng of KYAT1 enzyme.

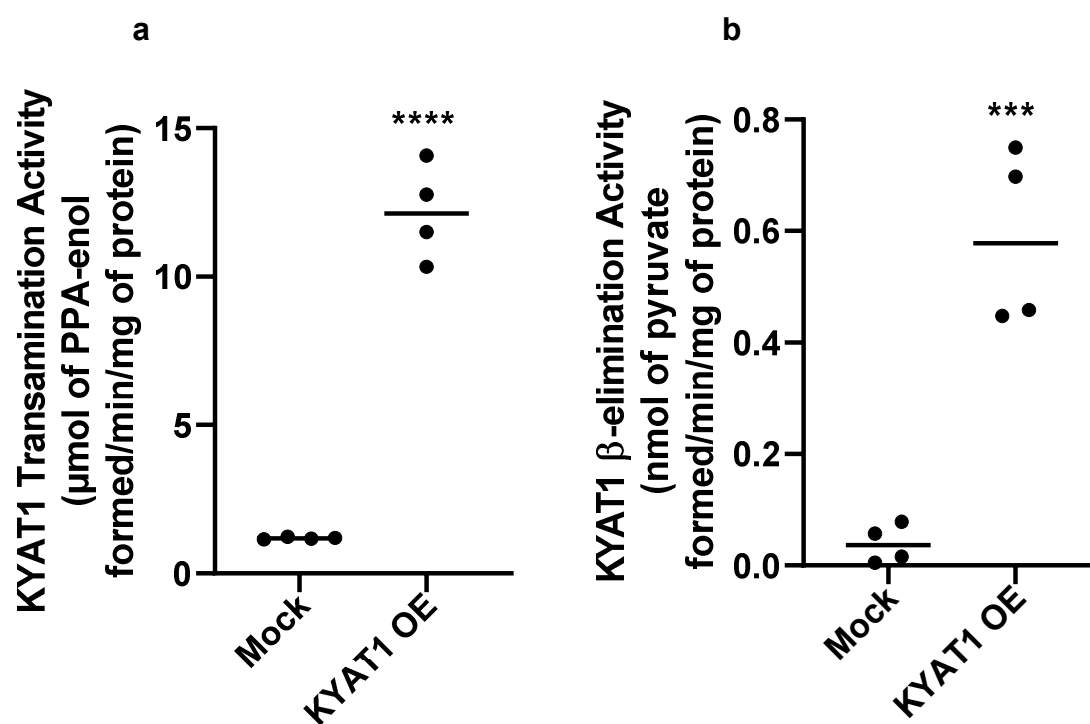

**Figure S2.** KYAT1 enzyme activity in Mock and KYAT1 overexpressed HEPG2 cells (a) Transamination activity at the end of 30 min in 20 µg of cell lysate (b) β-elimination activity at the end of 120 min in 20 µg of cell lysate.
